# Supplementary material
Source: publisher figshare collection journal article supplement (https://tandf.figshare.com/articles/dataset/_/4249814)
Supplement: Supplementary file 1 [file 1]

Archive with 6 entries (6 files):
- iamy_a_1238355_sm4212.xls
- iamy_a_1238355_sm4206.pdf
- iamy_a_1238355_sm4201.xls
- iamy_a_1238355_sm4200.pdf
- iamy_a_1238355_sm4199.xls
- iamy_a_1238355_sm4197.pdf
