# Supplementary material
Source: publisher figshare collection journal article supplement (https://tandf.figshare.com/articles/dataset/_/4249814)
Supplement: Supplementary file 1 [file 1 › iamy_a_1238355_sm4197.pdf]

|                                       | n  | %   |
|---------------------------------------|----|-----|
| Hanging of facial skin                | 29 | 100 |
| Limited field of vision               | 27 | 93  |
| Loss of (scalp) hair                  | 27 | 93  |
| Skin feels dry or itches              | 23 | 79  |
| Ectropion of lower eyelids            | 22 | 76  |
| Loss of (body) hair                   | 21 | 72  |
| Skin wounds easily                    | 17 | 59  |
| Skin bruises easily                   | 16 | 55  |
| Facial expressions impaired           | 17 | 59  |
| Facial sensation decreased            | 12 | 41  |
| Chronic paronychia                    | 19 | 66  |
| Nail or nail bed changes              | 14 | 48  |
| Problems in eating or drinking        | 16 | 55  |
| Problems in speech                    | 12 | 41  |
| Tongue appears big or clumsy          | 7  | 24  |
| Problems in wound healing             | 9  | 31  |
| Facial oedema                         | 5  | 17  |
| Strong reaction to mosquito bites     | 6  | 21  |
| Strong reaction to sun exposure       | 2  | 7   |
| Strong reaction to temperature change | 1  | 3   |
| Appearance limits social life         | 17 | 59  |

Supplementary Table S1. Symptoms reported by the 29 GA patients in the preoperative

ative interview.
