# Supplementary material
Source: publisher figshare collection journal article supplement (https://tandf.figshare.com/articles/dataset/_/4249814)
Supplement: Supplementary file 1 [file 1 › iamy_a_1238355_sm4199.xls]

## Sheet: Taul1
		n	%
	Hanging of facial skin	29	100
	Limited field of vision	27	93
	Loss of (scalp) hair	27	93
	Skin feels dry or itches	23	79
	Ectropion of lower eyelids	22	76
	Loss of (body) hair	21	72
	Skin wounds easily	17	59
	Skin bruises easily	16	55
	Facial expressions impaired	17	59
	Facial sensation decreased	12	41
	Chronic paronychia	19	66
	Nail or nail bed changes	14	48
	Problems in eating or drinking	16	55
	Problems in speech	12	41
	Tongue appears big or clumsy	7	24
	Problems in wound healing	9	31
	Facial oedema	5	17
	Strong reaction to mosquito bites	6	21
	Strong reaction to sun exposure	2	7
	Strong reaction to temperature change	1	3
	Appearance limits social life	17	59
