# Supplementary material
Source: publisher figshare collection journal article supplement (https://tandf.figshare.com/articles/dataset/_/4249814)
Supplement: Supplementary file 1 [file 1 › iamy_a_1238355_sm4200.pdf]

| Area               |                             | n  | %  |
|--------------------|-----------------------------|----|----|
| Facial skin        | Thickened, heavy            | 11 | 38 |
|                    | Thin, atrophied             | 10 | 34 |
|                    | Indistinct stage *          | 8  | 28 |
| Scalp hair         | Normal                      | 1  | 3  |
|                    | Hairline receded, hair thin | 22 | 76 |
|                    | Hair thin with bald areas   | 6  | 21 |
| Skin hair (in arm) | Normal                      | 3  | 10 |
|                    | Reduced                     | 14 | 48 |
|                    | Missing                     | 12 | 41 |

Supplementary Table S2. Clinical findings of skin quality and amount of hair

\* = Patients not clearly falling into 2 previous categories were named "in between" either in the beginning of the amyloid process or shifting between the two

amount of hair in the 29 HGA patients.  
named "indistinct", evaluated to be  
between the two stages.
