# Supplementary material
Source: publisher figshare collection journal article supplement (https://tandf.figshare.com/articles/dataset/_/4249814)
Supplement: Supplementary file 1 [file 1 › iamy_a_1238355_sm4201.xls]

## Sheet: Taul1
		Area		n	%
		Facial skin	Thickened, heavy	11	38
			Thin, atrophied	10	34
			Indistinct stage *	8	28
		Scalp hair	Normal	1	3
			Hairline receded, hair thin	22	76
			Hair thin with bald areas	6	21
		Skin hair (in arm)	Normal	3	10
			Reduced	14	48
			Missing	12	41
