# Supplementary material
Source: publisher figshare collection journal article supplement (https://tandf.figshare.com/articles/dataset/_/4249814)
Supplement: Supplementary file 1 [file 1 › iamy_a_1238355_sm4206.pdf]

|          | Age   | n  | Mean BMI |                      | Forehead             |                       | Cheek                    |                          | Mandible                |                          | Olecranon                |                         |
|----------|-------|----|----------|----------------------|----------------------|-----------------------|--------------------------|--------------------------|-------------------------|--------------------------|--------------------------|-------------------------|
|          |       |    |          |                      | Height               | Thickness             | Height                   | Thickness                | Height                  | Thickness                | Height                   | Thickness               |
| HGA      | 40-49 | 5  | 24,9     | range<br>mean/median | 4 ...18<br>9.5 / 6.5 | 4 ...7.5<br>5.7 / 6.2 | 17...27<br>22.6 / 25.5   | 3.2 ...8.9<br>6.2 / 6.6  | 21....36<br>28.3 / 27.5 | 2.8 ...6.5<br>4.5 / 4.5  | 21...41<br>31.9 / 33     | 3.6 ...6<br>4.7 / 4.4   |
|          | 50-59 | 3  | 28       | range<br>mean/median | 7...11<br>8.8 / 8.5  | 5 ...7.7<br>6.1 / 5.5 | 16 ...22.5<br>19.5 / 20  | 6.2 ...8.5<br>7.6 / 8.1  | 21 ...32<br>28 / 31     | 3.6 ...10<br>6 / 4.3     | 25 ...38.5<br>31.5 / 31  | 4.8 ...7.1<br>5.9 / 5.9 |
|          | 60-69 | 13 | 25,9     | range<br>mean/median | 2 ...21<br>6.9 / 6.0 | 2.3 ...8<br>5.3 / 5.1 | 4 ...31.5<br>19.5 / 21.5 | 4.5 ...12.6<br>7.3 / 6.2 | 13.5 ...35<br>22.7 / 24 | 3.2 ...11.8<br>6.8 / 6.2 | 20...36.5<br>25.9 / 25.5 | 3.6...9.7<br>6.1 / 5.3  |
|          | 70-79 | 7  | 24,5     | range<br>mean/median | 4 ...10<br>7.2 / 7.0 | 2...5.7<br>3.5 / 3.5  | 13 ...25                 | 4 ...11.2<br>6.2 / 6.0   | 18 ...30<br>23.4 / 23   | 3 ...12.5<br>5.8 / 4.6   | 16 ...28<br>22.4 / 25    | 3.7...6.5<br>4.9 / 4.9  |
|          | 80-89 | 1  | 22       | range<br>mean/median | 3<br>3 / 3           | 3.7<br>3.7 / 3.7      | 20.5<br>20.5 / 20.5      | 4.5<br>4.5 / 4.5         | 22<br>22 / 22           | 4<br>4 / 4               | 28<br>28 / 28            | 5<br>5 / 5              |
|          | all   | 29 | 25,6     | range                | 2 ...21              | 2 ...8                | 4 ...31.5                | 3.2 ...12.6              | 13.5 ...36              | 2.8 ...12.5              | 16 ...41                 | 3.6 ...9.7              |
| Controls | 40-49 | 2  | 25,9     | range<br>mean/median | *<br>10.5 / 10.5     | *<br>6.7 / 6.7        | 8 ...13<br>10.5 / 10.5   | 6.4 ...7<br>6.7 / 6.7    | 11 ...19<br>15 / 15     | 6.7 ...6.9<br>6.8 / 6.8  | 16 ...18<br>17 / 17      | 3.8 ...4.9<br>4.4 / 4.4 |
|          | 50-59 | 4  | 26,5     | range<br>mean/median | *<br>9.8 / 9         | *<br>7.7 / 7.7        | 8 ...13<br>9.8 / 9       | 7.4 ...8<br>7.7 / 7.7    | 8 ...13<br>10.3 / 10    | 3.4 ...8.8<br>7 / 7.8    | 15 ...20<br>17.8 / 18    | 4 ...4.2<br>4.2 / 4.2   |
|          | 60-69 | 1  | 27,9     | range<br>mean/median | *<br>11 / 11         | *<br>9 / 9            | 11<br>11 / 11            | 9<br>9 / 9               | 10<br>10 / 10           | 10<br>10 / 10            | 13<br>13 / 13            | 4<br>4 / 4              |
|          | 70-79 | 3  | 28       | range<br>mean/median | *<br>15.3 / 15       | *<br>9.1 / 8.8        | 14 ...17<br>15.3 / 15    | 6.6 ...12<br>9.1 / 8.8   | 16 ...17<br>16.3 / 16   | 7 ...10<br>8.3 / 8       | 15 ...17<br>13 / 16      | 3.6 ...5.8<br>4.6 / 4.4 |
|          | 80-89 | 0  | -        |                      | -                    | -                     | -                        | -                        | -                       | -                        | -                        | -                       |
|          | all   | 10 | 27       | range                | *                    | *                     | 8 ...17                  | 6.4 ...12                | 8 ...19                 | 3.4 ...10                | 13 ...20                 | 3.6 ...5.8              |

SupplementaryTable S3. Details of some skin fold measurements (in millimeters) in 29 gelsolin amyloidosis (HGA) patients and in 10 healthy controls (BMI = body mass index). Minimum and maximum measurements together with mean and median values are presented.

\* = Non-measurable wide and thick skin elevation, firmly attached to galea.
