# Supplementary material
Source: publisher figshare collection journal article supplement (https://tandf.figshare.com/articles/dataset/_/4249814)
Supplement: Supplementary file 1 [file 1 › iamy_a_1238355_sm4212.xls]

## Sheet: Taul1
						Forehead		Cheek		Mandible		Olecranon
		Age	n	Mean BMI		Height	Thickness	Height	Thickness	Height	Thickness	Height	Thickness
	HGA	40-49	5	24.9	range	4 …18	4 …7.5	17…27	3.2 …8.9	21….36	2.8 …6.5	21…41	3.6 …6
					mean/median	9.5 / 6.5	5.7 / 6.2	22.6 / 25.5	6.2 /6.6	28.3 /27.5	4.5 / 4.5	31.9 / 33	4.7 / 4.4
		50-59	3	28	range	7…11	5 …7.7	16 …22.5	6.2 …8.5	21 …32	3.6 …10	25 …38.5	4.8 …7.1
					mean/median	8.8 / 8.5	6.1 / 5.5	19.5 / 20	7.6 / 8.1	28 / 31	6 / 4.3	31.5 / 31	5.9 / 5.9
		60-69	13	25.9	range	2 …21	2.3 …8	4 …31.5	4.5 …12.6	13.5 …35	3.2 …11.8	20…36.5	3.6…9.7
					mean/median	6.9 / 6.0	5.3 / 5.1	19.5 / 21.5	7.3 / 6.2	22.7 / 24	6.8 / 6.2	25.9 / 25.5	6.1 / 5.3
		70-79	7	24.5	range	4 …10	2…5.7	13 …25	4 …11.2	18 …30	3 …12.5	16 …28	3.7…6.5
					mean/median	7.2 / 7.0	3.5 / 3.5		6.2 / 6.0	23.4 / 23	5.8 / 4.6	22.4 / 25	4.9 / 4.9
		80-89	1	22	range	3	3.7	20.5	4.5	22	4	28	5
					mean/median	3 / 3	3.7 / 3.7	20.5 / 20.5	4.5 / 4.5	22 / 22	4 / 4	28 / 28	5 / 5
		all	29	25.6	range	2 …21	2 …8	4 …31.5	3.2 …12.6	13.5 …36	2.8 …12.5	16 …41	3.6 …9.7
	Controls	40-49	2	25.9	range	*	*	8 …13	6.4 …7	11 …19	6.7 …6.9	16 …18	3.8 …4.9
					mean/median			10.5 / 10.5	6.7 / 6.7	15 / 15	6.8 / 6.8	17 / 17	4.4 / 4.4
		50-59	4	26.5	range	*	*	8 …13	7.4 …8	8 …13	3.4 …8.8	15 …20	4 …4.2
					mean/median			9.8 / 9	7.7 / 7.7	10.3 / 10	7 / 7.8	17.8 / 18	4.2 / 4.2
		60-69	1	27.9	range	*	*	11	9	10	10	13	4
					mean/median			11 / 11	9 / 9	10 / 10	10/ 10	13 / 13	4 / 4
		70-79	3	28	range	*	*	14 …17	6.6 …12	16 …17	7 …10	15 …17	3.6 …5.8
					mean/median			15.3 / 15	9.1 / 8.8	16.3 / 16	8.3 / 8	13 / 16	4.6 / 4.4
		80-89	0	-		-	-	-	-	-	-	-	-
		all	10	27	range	*	*	8 …17	6.4 …12	8 …19	3.4 …10	13 …20	3.6 …5.8
